# Supplementary material for: Operative Treatment of Intra-Articular Distal Radius Fractures With versus Without Arthroscopy: study protocol for a randomised controlled trial
Source: PubMed Central journal article supplement (PMC5797370; doi:10.1186/s13063-017-2409-2), 2018-02-02
Supplement: 13063_2017_2409_MOESM3_ESM.pdf [file 13063_2017_2409_MOESM3_ESM.pdf]

1 Additional file 3. Outerbridge classification for cartilage damage

- 2 • Grade 0: normal cartilage
- 3 • Grade I: cartilage with softening and swelling
- 4 • Grade II: partial-thickness defect with fissures on the surface that do not reach
- 5 subchondral bone or exceed 1.5 cm in diameter
- 6 • Grade III: fissuring to the level of subchondral bone in an area with a diameter
- 7 more than 1.5 cm
- 8 • Grade IV: exposed subchondral bone

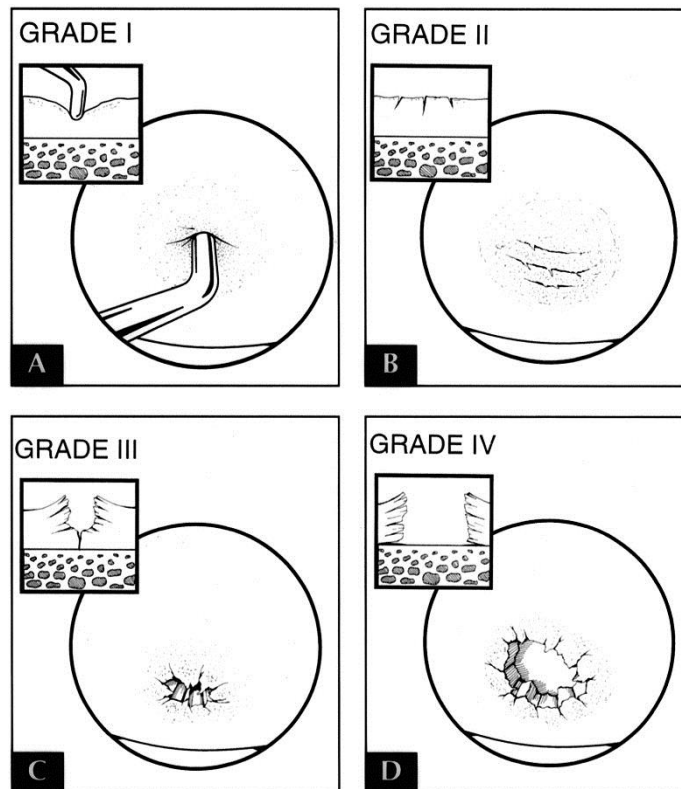

9
