# Supplementary material for: Operative Treatment of Intra-Articular Distal Radius Fractures With versus Without Arthroscopy: study protocol for a randomised controlled trial
Source: PubMed Central journal article supplement (PMC5797370; doi:10.1186/s13063-017-2409-2), 2018-02-02
Supplement: 13063_2017_2409_MOESM4_ESM.pdf [file 13063_2017_2409_MOESM4_ESM.pdf]

1 Additional file 4. Palmer classification for TFCC acute traumatic tears

- 2 • A: central perforation
- 3 • B: Ulnar avulsion with or without distal ulnar fracture (may involve the proximal
- 4 or distal lamina (foveal and styloid attachment, respectively) or both)
- 5 • C: Distal avulsion
- 6 • D: Radial avulsion with or without sigmoid notch fracture

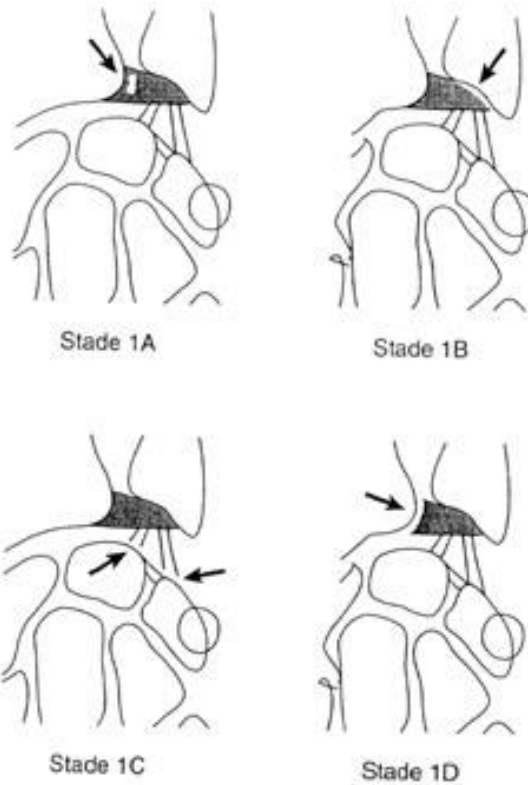

7
