# Supplementary material for: Operative Treatment of Intra-Articular Distal Radius Fractures With versus Without Arthroscopy: study protocol for a randomised controlled trial
Source: PubMed Central journal article supplement (PMC5797370; doi:10.1186/s13063-017-2409-2), 2018-02-02
Supplement: 13063_2017_2409_MOESM5_ESM.pdf [file 13063_2017_2409_MOESM5_ESM.pdf]

1 Additional file 5. Geissler classification for SL and LT tears

- 2 • I: Attenuation and/or hemorrhage of the interosseous ligament as observed from  
3 the radiocarpal joint. No incongruence of carpal alignment in midcarpal space
- 4 • II: Attenuation and/or hemorrhage of the interosseous ligament, as observed  
5 from the radiocarpal joint. Incongruence and/or step-off, as observed from the  
6 midcarpal space. A slight gap (less than the width of a probe) between the carpals  
7 may be present.C: Distal avulsion
- 8 • III: Incongruence and/or step-off of the carpal alignment are observed in both the  
9 radiocarpal and midcarpal space. The probe may be passed through a gap  
10 between the carpals
- 11 • IV: Incongruence and/or step-off of the carpal alignment are observed in both the  
12 radiocarpal and midcarpal space. Gross instability with manipulation is noted. A  
13 2.7-mm arthroscope may be passed through the gap between the carpals.
